## Review

## Intrinsic danger: activation of Toll-like receptors in rheumatoid arthritis

Fui G. Goh<sup>1</sup> and Kim S. Midwood<sup>2</sup>

## Abstract

RA is a debilitating disorder that manifests as chronic localized synovial and systemic inflammation leading to progressive joint destruction. Recent advances in the molecular basis of RA highlight the role of both the innate and adaptive immune system in disease pathogenesis. Specifically, data obtained from *in vivo* animal models and *ex vivo* human tissue explants models has confirmed the central role of Toll-like receptors (TLRs) in RA. TLRs are pattern recognition receptors (PRRs) that constitute one of the primary host defence mechanisms against infectious and non-infectious insult. This receptor family is activated by pathogen-associated molecular patterns (PAMPs) and by damage-associated molecular patterns (DAMPs). DAMPs are host-encoded proteins released during tissue injury and cell death that activate TLRs during sterile inflammation. DAMPs are also proposed to drive aberrant stimulation of TLRs in the RA joint resulting in increased expression of cytokines, chemokines and proteases, perpetuating a vicious inflammatory cycle that constitutes the hallmark chronic inflammation of RA. In this review, we discuss the signalling mechanisms of TLRs, the central function of TLRs in the pathogenesis of RA, the role of endogenous danger signals in driving TLR activation within the context of RA and the current preclinical and clinical strategies available to date in therapeutic targeting of TLRs in RA.

**Key words:** Toll-like receptors, rheumatoid arthritis, damage-associated molecular patterns, therapies

## RA

RA is a chronic autoimmune disease that can affect multiple joints of the hands and feet simultaneously. It results in pain, stiffness and progressive destruction of bone and cartilage, leading to significant disability and deformity, often with extra-articular manifestations such as vasculitis and scleritis [1]. RA is prevalent in ~1% of the population and its association with increased mortality and shortened lifespan imposes vast socio-economic costs [2].

RA is characterized by persistent inflammation of the synovial membrane. Fibroblast proliferation and infiltration of inflammatory cells including T cells, B cells and macrophages [3] lead to pannus development, which invades joint tissue [4, 5]. These cell types release

pro-inflammatory cytokines and chemokines that induce degrading enzymes such as matrix metalloproteinases (MMPs) and osteoclast activation, resulting in further cartilage degradation and bone erosion [6]. Biological agents targeting some of these cytokines such as TNF- $\alpha$ , IL-1 $\beta$  and IL-6 show significant clinical benefit and halt radiographic progression, confirming the key role of these innate inflammatory mediators in RA [3, 7]. In addition, adaptive immunity is also pivotal in RA pathogenesis. Abundant activated T cells exist in rheumatoid synovium [8]. Disruption of T-cell co-stimulation using soluble cytotoxic T-lymphocyte antigen (CTLA)-4 fused with immunoglobulin improves clinical outcomes in RA patients [9]. IL-17-producing Th cells have also been detected in RA synovium, and targeting this cytokine using soluble antibodies has proven beneficial [10, 11]. Additionally, B-cell therapy utilizing mAbs targeting cluster of differentiation 20 (CD20) has been efficacious in treating RA patients [12]. However, despite the success of these treatments, only a proportion of RA patients respond well. Adverse side effects are associated with global suppression of immunity, and most patients suffer disease recurrence [13]. One of the major obstacles to finding a cure for RA is that the factors that drive persistent cellular activation and inflammatory mediator synthesis remain elusive.

<sup>1</sup>Sharjah Institute of Medical Research, University of Sharjah, Sharjah, United Arab Emirates and <sup>2</sup>Kennedy Institute of Rheumatology Division, Matrix Biology Department, Faculty of Medicine, Imperial College of Science, Technology and Medicine, Hammersmith, London, UK.

Submitted 24 April 2011; revised version accepted 14 June 2011.

Correspondence to: Kim S. Midwood, Kennedy Institute of Rheumatology Division, Matrix Biology Department, Faculty of Medicine, Imperial College of Science, Technology and Medicine, 65 Aspenlea Road, Hammersmith, London W6 8LH, UK.  
E-mail: k.midwood@imperial.ac.uk

Although there have been great advances in understanding the cellular and molecular mechanisms that drive inflammation in RA, the aetiology of this disease is still a mystery. RA is a multifactorial disease in which genetic and environmental factors have been implicated. Since the identification of *HLA-DRB1* as a susceptible gene in RA, more than 30 other loci have been shown to exhibit genetic variants that predispose to the disease, including *PADI4*, *PTPN22* and *FCRL3* (reviewed in [14]). Epidemiological studies also propose cigarette smoking as a major environmental trigger for RA, especially in genetically predisposed individuals [15], which is supported by data from animal models [16, 17]. In addition, infection and tissue injury have also been implicated in triggering inflammation in RA. Over the past decade, Toll-like receptors (TLRs), central players in sensing infection and injury, have been proposed to drive inflammation in RA. Here we review the evidence surrounding the emergence of these pattern recognition receptors (PRRs) in RA disease pathogenesis.

## TLRs

TLRs are a family of evolutionarily conserved single-span transmembrane receptors that exhibit high homology with the Toll gene in *Drosophila melanogaster* [18]. With the addition of newly identified murine TLR13 [19], 14 mammalian TLRs have been reported, with 10 subtypes in humans. TLRs are expressed on many different cell types, including myeloid cells, fibroblasts, epithelial and endothelial cells. TLRs sense pathogen-associated molecular patterns (PAMPs) derived from viruses, bacteria, protozoa and fungi, with each TLR recognizing a specific subset of ligands (reviewed in [20, 21]). TLR4, the receptor for bacterial lipopolysaccharide (LPS), was the first human TLR identified [22] and remains the best characterized to date. It utilizes myeloid differentiation protein 2 (MD2), CD14 and LPS-binding protein (LBP) as accessory molecules for LPS recognition [23]. TLR1, TLR2 and TLR6 detect bacterial lipoproteins and dimerization of TLR2 with either TLR1 or TLR6 confers ligand specificity. TLR5 senses flagellin, TLR9 recognizes unmethylated C-phosphate-G (CpG) bacterial DNA and TLR3, TLR7 and TLR8 bind to viral nucleic acids. The subcellular localization of TLRs corresponds well to the nature of their pathogenic ligands; TLR1, TLR2, TLR4, TLR5 and TLR6 are expressed on the cell surface and detect pathogenic surface elements, whereas TLR3 and TLR7–9 are found primarily in the intracellular endosome and detect internalized ligands. The exact function of TLR10 remains largely unexplored due to the fact that it is not present in mice, though a recent study indicates that TLR10 might cooperate with TLR2 in detecting lipoproteins [24, 25].

More recently, TLRs have also been found to sense endogenous danger signals or damage-associated molecular patterns (DAMPs) (Table 1). These include intracellular molecules released during cell necrosis [26], such as cytosolic HSPs and nuclear high mobility group box 1 (HMGB1). DAMPs also comprise extracellular matrix (ECM) molecules such as versican, biglycan, fibrinogen, fibronectin extra-domain A (EDA) and tenascin-C that are

specifically up-regulated in response to tissue injury, and low molecular weight fragments of the ECM, such as HA and heparin sulphate, that are generated by tissue damage. TLRs also exhibit specificity for DAMPs, with cell surface family members detecting protein, proteoglycan and fatty acids and endosomal TLRs sensing endogenous nucleic acids. DAMPs are vital for the initiation of inflammation during tissue injury in the absence of infection, but have also been implicated in various pathophysiological conditions that are characterized by sterile chronic inflammation (Fig. 1) such as tumorigenesis, stroke, cardiovascular and autoimmune diseases (reviewed in [27–31]).

## TLR-mediated signalling pathways

Each TLR consists of amino-terminal leucine-rich repeats (LRRs) that comprise the ligand-sensing domain and a carboxy-terminal Toll/IL-1 receptor (TIR) signalling domain (reviewed in [82]). The overall sequence homology among the TLRs is low, but the TIR domain that is essential for downstream signalling is highly conserved [83, 84]. Ligand binding induces receptor conformational changes and results in the recruitment and/or activation of adaptor molecules that initiate a cascade of inflammatory signalling events. These are reviewed extensively elsewhere [20, 21, 85–87] and are summarized in Fig. 2.

## PAMPs vs DAMPs: mechanism of ligand recognition and downstream signalling

Recent crystallographic structures of PAMP-TLR ectodomain complexes have disclosed a common m-shape configuration of TLR dimers [90–94]. Pam<sub>3</sub>CSK<sub>4</sub> binding to TLR1–TLR2 facilitates receptor heterodimerization via hydrophobic interactions [90] and two phenylalanine residues in the TLR2–TLR6 heterodimer are important for lipopeptide docking and binding specificity [91]. Crystal structures of several pathogen-derived TLR2 agonists have also been reported, including PorB [95], NapA [96], lipoprotein A [97] and LprG [98]. TLR3 interacts with dsRNA through the cationic surface of the receptor, while the receptor dimer is held in place by intermolecular forces within TLR3 [93]. In contrast, LPS binding to MD2 results in the formation of a multimer composing two units of the TLR4–MD2–LPS complex [92, 94]; multifaceted interactions within this complex mediate hydrophobic and hydrophilic bonding between TLR4 and MD2, as well as to the overhanging sixth acyl chain of LPS [94]. Thus, although TLRs display similar scaffold structures, distinct binding mechanisms exist to facilitate recognition of ligands derived from diverse origins.

While the mode of PAMP activation of TLRs is being elucidated, very little is known about the mode of TLR activation by DAMPs. To date, no direct interaction of a DAMP with its cognate TLR has been described. Little structural information about endogenous TLR ligands exists, except a recent study that described the crystal structure of pancreatic adenocarcinoma up-regulated factor (PAUF) and confirmed its role as a novel endogenous TLR2 and TLR4 agonist [44]. Accumulating evidence has

**TABLE 1** Endogenous TLR activators

| Class of activator                            | TLR1                     | TLR2                                                                                                                                                                                                              | TLR4                                                                                                                                                                                                                                                                                                                                                                                                                                                                                                                              | TLR3      | TLR7       | TLR8                                 | TLR9                         |
|-----------------------------------------------|--------------------------|-------------------------------------------------------------------------------------------------------------------------------------------------------------------------------------------------------------------|-----------------------------------------------------------------------------------------------------------------------------------------------------------------------------------------------------------------------------------------------------------------------------------------------------------------------------------------------------------------------------------------------------------------------------------------------------------------------------------------------------------------------------------|-----------|------------|--------------------------------------|------------------------------|
| Proteins/peptides                             | $\beta$ -defensin 3 [32] | HSP60, 70, GP96 [33–35]<br>HMGB1 [36, 37]<br>HMGB1-nucleosome complexes [38]<br>$\beta$ -defensin 3 [32]<br>Surfactant proteins A, D [39, 40]<br>Neurotoxin [41]<br>aPLs [42]<br>Cardiac myosin [43]<br>PAUF [44] | HMGB1 [36, 37]<br>Fibronectin EDA [45]<br>Fibrinogen [46]<br>Tenascin-C (FBG) [47]<br>Surfactant proteins A, D [40, 48]<br>$\beta$ -defensin 2 [49]<br>HSP90, 70, 72, 22, GP96 [33–35, 50–53]<br>S100A8 (MRP8) [54, 55]<br>S100A9 (MRP14) [54, 55]<br>NE [56]<br>aPLs [57, 58]<br>Lactoferrin [59]<br>Resistin [60]<br>PAUF [44]<br>Serum amyloid A [66, 67]<br>Oxidized LDL [68–70]<br>Saturated fatty acids [71, 72]<br>Biglycan [73]<br>Heparin sulphate fragments [76]<br>HA fragments [75]<br>Monosodium urate crystals [77] |           | aPLs [61]  | aPLs [61, 62]<br>Cardiac myosin [43] |                              |
| Fatty acids/lipoproteins                      |                          | Serum amyloid A [63, 64]<br>CEP [65]                                                                                                                                                                              |                                                                                                                                                                                                                                                                                                                                                                                                                                                                                                                                   |           |            |                                      |                              |
| Proteoglycans/glycosaminoglycans              |                          | Biglycan [73]<br>Versican [74]<br>HA fragments [75]                                                                                                                                                               |                                                                                                                                                                                                                                                                                                                                                                                                                                                                                                                                   |           |            |                                      |                              |
| Organic molecules                             |                          | Monosodium urate crystals [77, 78]                                                                                                                                                                                |                                                                                                                                                                                                                                                                                                                                                                                                                                                                                                                                   |           |            |                                      |                              |
| Nucleic acids/protein-nucleic acids complexes |                          |                                                                                                                                                                                                                   |                                                                                                                                                                                                                                                                                                                                                                                                                                                                                                                                   | mRNA [79] | ssRNA [80] | ssRNA [80]                           | IgG-chromatin complexes [81] |

CEP: omega-(2 carboxyethyl)pyrrole; IgG: immunoglobulin G; LDL: low-density lipoprotein; NE: neutrophil elastase; PAUF: pancreatic adenocarcinoma up-regulated factor; ssRNA: single-stranded RNA.

**Fig. 1** Release of DAMPs during tissue injury and cell damage activate TLRs—a vicious inflammatory cycle. Binding of DAMPs to TLRs leads to receptor activation and downstream signalling stimulation, resulting in translocation of transcription factors into nucleus and up-regulation of pro-inflammatory mediators such as cytokines, chemokines and MMPs. This in turn perpetuates the inflammatory responses and results in chronic inflammation.

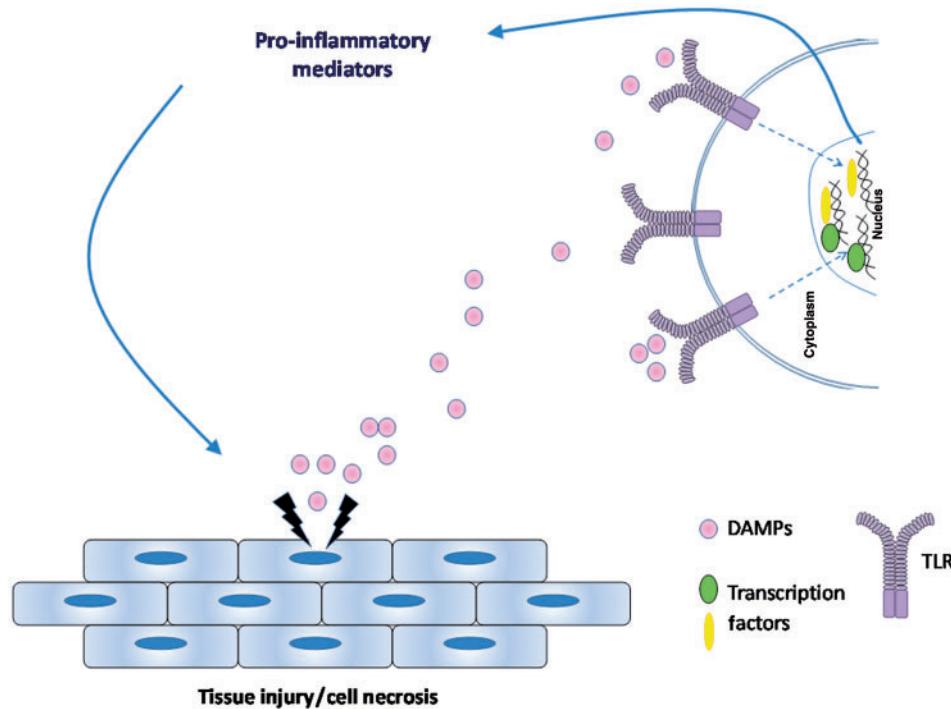

suggested significant disparity in the ligand recognition mechanism for PAMPs and DAMPs (reviewed in [99]). Endogenous ligands might occupy or bind different sites on TLR. For example, mutation of asp299 and/or thr399 in TLR4, which are important for receptor dimerization, rendered the receptor unresponsive to LPS, but stimulated fibrinogen-mediated TLR4 activation [100]. Additionally, DAMPs appear to employ distinctive combinations of co-receptors and accessory proteins to mediate receptor activation (Table 2). Interestingly, certain DAMPs seem to be involved in novel signalling paradigms; for example, biglycan stimulates the NLRP3/ASC inflammasome via TLR2/TLR4 and purinergic P2X<sub>4</sub>/P2X<sub>7</sub> receptors [101], and PAUF signals through a TLR2/CXC chemokine receptor 4 (CXCR4) complex [44].

It seems logical to envisage that the signalling outcomes of DAMPs might be distinct from PAMP. This is supported by several lines of evidence. For example, gene expression profiles induced by hyaluronan and tenascin-C are significantly different from that induced by LPS [47, 103, 111]. Genes such as MMP13 and suppressor of cytokine signalling 3 (SOCS3) were specifically induced by hyaluronan but not LPS [103]. Tenascin-C did not induce IL-8 in synovial fibroblasts, contrary to the effect of LPS [47]. Interestingly, PAUF-stimulated mitogen-activated protein kinase (MAPK) signalling pathways, in contrast to LPS, did not activate nuclear factor kappa B (NF- $\kappa$ B), but instead cooperate with CXCR4 to inhibit TLR2-mediated NF- $\kappa$ B activation [44].

Evidence has emerged that some endogenous ligands such as HSPs, HMGB1 and surfactant protein A also possess the ability to bind LPS and/or sensitize the cells to LPS stimulation, raising the possibility that these molecules also behave as accessory proteins in LPS signalling (reviewed in [1]). For instance, HMGB1 mediates the transfer of LPS to CD14, thereby augmenting TLR4 activation [112, 113]. While low concentrations of Gp96 did not elicit any response on their own; co-incubation with TLR2 or TLR4 agonists resulted in potentiation of TLR response [114]. Taken together these data indicate that DAMPs exhibit intricate differences to PAMPs in terms of receptor activation and type of immune response induced, ranging from the utilization of specific co-receptors and, adaptor molecules to activation of signalling cascades and the resultant gene expression pattern.

## The role of TLRs in RA

### Elevated levels of TLR expression in human RA joints

A number of different studies provide compelling evidence for the presence of TLRs in human synovial tissues. TLR3 and TLR4 are highly expressed in human synovial fibroblasts, even in the early stages of RA [115]. Abundant expression of TLR2 was detected at sites of cartilage and bone erosion [116]. The expression of TLR2, TLR3 and TLR7 was significantly up-regulated in RA synovial fibroblasts (RASFs) compared with healthy controls or

**Fig. 2** Overview of TLR signalling pathways. Cell surface TLRs are TLR1/6 with TLR2, TLR4 and TLR5 (not shown). Endosomal TLRs are TLR3 and TLR7–9 (not shown). MyD88 is an adaptor protein associated with all TLRs, with the exception of TLR3. TLR1, TLR2, TLR4 and TLR6 require an additional protein, TIRAP, for MyD88 recruitment, whereas TLR5, TLR7 and TLR9 can bind MyD88 directly. TLR3, together with TLR4, utilize TRIF to mediate signal transduction. TRIF-related adaptor molecule (TRAM) is another adaptor molecule associated with TLR4, necessary for the interaction with TRIF [88]. Generally, activation of the MyD88-dependent pathway leads to activation of signalling intermediaries such as IRAK, TRAF-6 and TANK-binding kinase (TBK)-1 proteins, MAPKs and transcription factor NF- $\kappa$ B [89]. Activation of NF- $\kappa$ B results in increased expression of various pro-inflammatory cytokines such as TNF- $\alpha$ , IL-6 and chemokines. Stimulation of the MyD88-independent TRIF-dependent pathway leads to activation of the transcription factor IRF proteins and IFN response. Recruitment of IRF3 to the respective DNA binding site initiates the transcriptional activation of IFN- $\beta$  and IFN-stimulated genes. ERK: extracellular-signal regulated kinase; JNK: c-jun N-terminal kinase; AP-1: activating protein-1; MyD88: myeloid differentiation primary response protein 88.

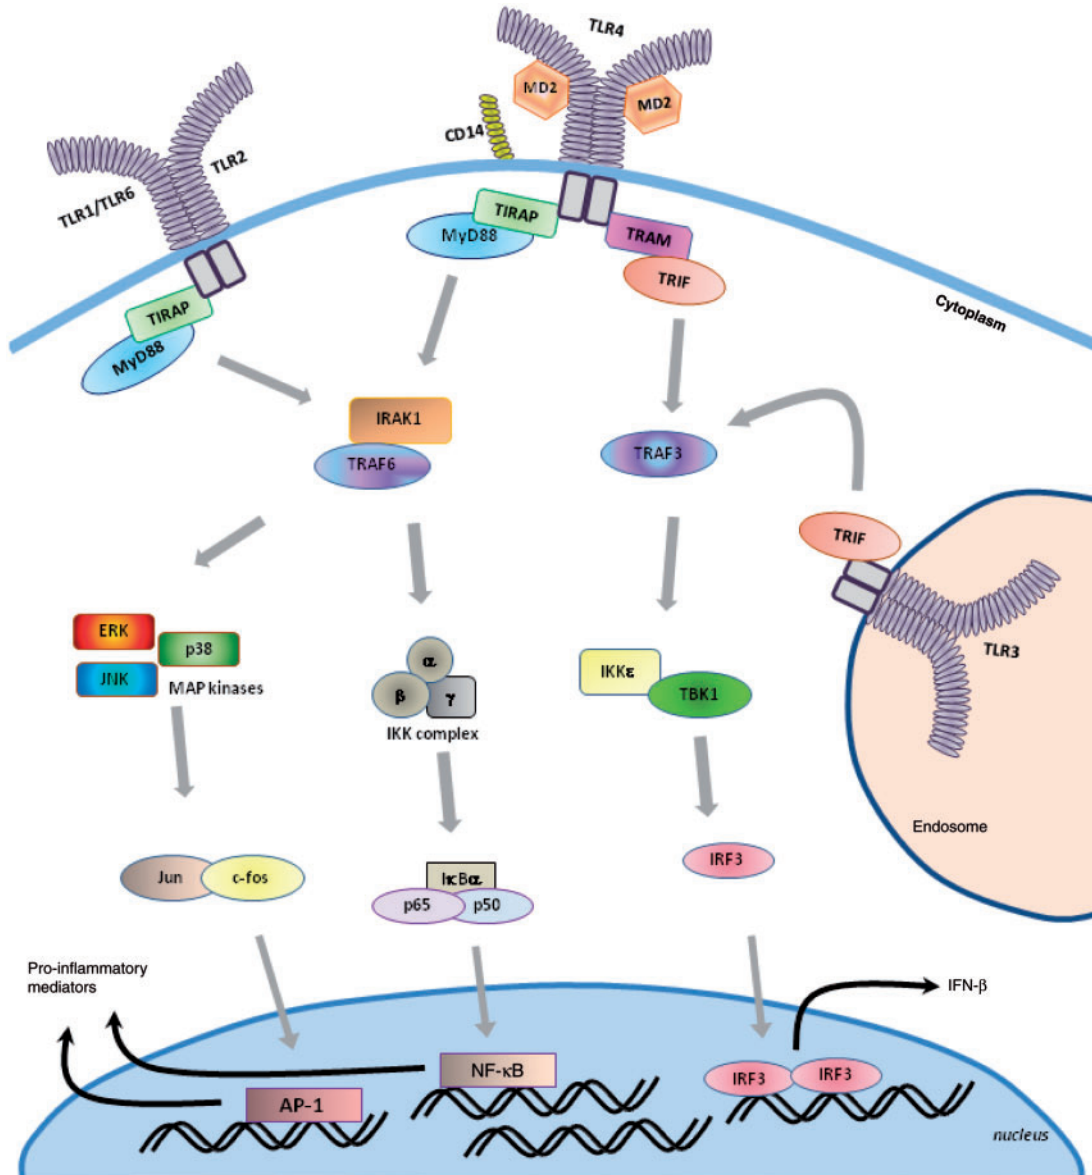

patients with non-inflammatory arthritis [117–120]. In addition to RASFs, increased expression and activity of TLR2 and TLR4 has also been detected on macrophages isolated from RA synovium [117]. Stimulation of cultured RASFs with TLR3 and TLR7 ligands resulted in significant

up-regulation of chemokines, cytokines, metalloproteinases and type I IFNs [115, 119, 120]. Similarly, TLR2, TLR3 and TLR4 activation in RASF results in osteoclastogenic activity, MMP release and up-regulation of vascular adhesion molecule-1 [118, 121–123]. Notably, while



**TABLE 2** The co-receptors and accessory proteins utilized by DAMPs to bind to respective TLRs

|                                    |                                                                           |
|------------------------------------|---------------------------------------------------------------------------|
| TLR2                               |                                                                           |
| CD14/MD2                           | HSP60 [102], HSP70 [33], biglycan [73]                                    |
| CD14                               | Surfactant protein A [39, 48], surfactant protein D [40]                  |
| MD2                                | Gp96 [34], HMGB1 [36]                                                     |
| P2X <sub>4</sub> /P2X <sub>7</sub> | Biglycan [101]                                                            |
| TLR6/CD14                          | Versican [74]                                                             |
| CD44/MD2                           | HA fragments [103]                                                        |
| CXCR4                              | PAUF [44]                                                                 |
| TLR4                               |                                                                           |
| CD14 / MD2                         | HSP60 [102], HSP70 [33], oxidized LDL [70], S100A8, S100A9, biglycan [73] |
| CD14                               | Lactoferrin [59], surfactant protein A [48], surfactant protein D [40]    |
| MD2                                | GP96 [34], HMGB1 [36], fibronectin EDA [45], saturated fatty acids [71]   |
| P2X <sub>4</sub> /P2X <sub>7</sub> | Biglycan [101]                                                            |
| CD44/MD2                           | HA fragments [103]                                                        |
| TLR6/CD36                          | Serum amyloid A [104], oxidized LDL [104]                                 |
| TLR7                               |                                                                           |
| LL37                               | ssRNA [105]                                                               |
| BCR                                | RNA-associated autoantigens [106]                                         |
| TLR9                               |                                                                           |
| LL37                               | dsRNA [107]                                                               |
| BCR                                | IgG-chromatin complexes [108]                                             |
| CD32                               | DNA-containing ICs [38, 109]                                              |
| IgM                                | IgG-chromatin complexes [81]                                              |
| RAGE/HMGB1                         | DNA-containing ICs [110]                                                  |
| TLR8                               |                                                                           |
| LL37                               | ssRNA [105]                                                               |

RAGE: receptor for advanced glycation endproducts.

stimulation of TLR3 and TLR8 increased TNF- $\alpha$  release in RA membrane cultures, activation of TLR7 or TLR9 did not, suggesting that TLR3 and TLR8 may be of more importance [124]. Inhibition of myeloid differentiation primary response protein 88 (MyD88) and TIR domain-containing adapter protein (TIRAP), the adaptors for TLR2 and TLR4, reduces cytokine synthesis in RA membranes, indicating that these TLRs also play a key role [122]. A recent study that utilizes double immunostaining of various cell types derived from human RA joints showed that TLRs 1–6, TIRAP and TIR domain-containing adapter-inducing IFN- $\beta$  (TRIF) are most strongly expressed in dendritic cells, followed by macrophages and the least in fibroblasts [125]. Collectively, several cell types in human RA joints express high levels of functional TLRs.

#### Evidence from animal experimental models

Many experimental models of arthritis require TLR ligand administration for disease induction; for example, bacterial DNA, streptococcal cell wall, zymosan and the use of complete Freund's adjuvant (CFA) in CIA [126–128]. Therefore disease amelioration in animals lacking specific

TLRs and adaptor molecules is perhaps not unanticipated [129–131]. Nevertheless, the use of models not reliant on TLRs for disease induction supports the role of TLRs in persistent inflammation. In a serum-transfer model, disease duration was shortened in TLR4 null mice [132]. Mice lacking IL-1RA develop spontaneous arthritis due to increased production of IL-17 [133, 134]. Significantly reduced disease severity was observed in IL1-RA<sup>-/-</sup> and TLR4<sup>-/-</sup> double-knock-out mice and in the presence of a TLR4 antagonist [135]. TLR4 is postulated to be the upstream driving force of IL-17 production in this model. Intriguingly, IL-1RA<sup>-/-</sup> and TLR2<sup>-/-</sup> double-knock-out mice showed increased disease severity, casting doubt on the pro-inflammatory role of TLR2 in this context, while TLR9 did not affect disease development [135]. Interestingly, repeated *in vivo* low-dose administration of synthetic TLR7 ligand, which resulted in the tolerance of TLR2, TLR7 and TLR9, suppressed joint inflammation in a serum-transfer arthritis model [136]. Taking into account the results obtained from TLR2 and TLR9 knock-out models, TLR7 may play a key role in this context. Another recent study proposed TLR3 as the central player in the pristane-induced arthritis rat model; receptor expression was significantly up-regulated during early disease stages, disease augmentation occurred upon TLR3 stimulation, and small interfering RNA (siRNA) targeting TLR3 *in vivo* reduced disease severity [137].

Although TLR8 is up-regulated in human RA tissues, little information has been derived from animal studies. Unlike its phylogenetically related TLR7 and human TLR8, murine TLR8 is not activated by its natural ligand viral ssRNA, leading to the general belief that TLR8 is biologically dysfunctional in mice [138]. Similarly, TLR10 is not present in mice [24]. Moreover, the intrinsic details of TLR signalling and activation of target genes is species specific. For example, TLR4 and TLR3 stimulation in murine cells leads to NF- $\kappa$ B activation and TNF- $\alpha$  and IL-6 synthesis, while in human cells this is only observed with TLR4, but not TLR3 engagement [139, 140]. Interestingly, nickel-induced contact hypersensitivity, mediated via TLR4 activation, is a phenomenon specific to humans, as murine TLR4 is not activated by nickel [141]. These data highlight the fact that cross-species data extrapolation should be undertaken cautiously.

#### Endogenous TLR activators in the pathogenesis of RA

Infection has long been speculated to be an underlying factor in RA pathogenesis. Early studies reported the presence of peptidoglycan, bacterial and viral DNA in joints of RA patients, implicating PAMP activation of TLRs as a potential driver of disease [142, 143]. However, this theory remains controversial, as pathogenic molecules are also found at comparable levels in the joints of healthy individuals [144]. A large body of evidence has documented the presence of endogenous TLR ligands in RA tissues, predominantly TLR4 and/or TLR2 agonists. These include HSPs, fibrinogen, fibronectin EDA, HMGB1, tenascin-C and serum amyloid A (reviewed in [99]). Moreover, administration of exogenous DAMPs induces

joint inflammation *in vivo*. For example, intra-articular (IA) injection of fibronectin EDA resulted in joint swelling [145]. We have also shown that injection of tenascin-C induced joint inflammation, while mice deficient in tenascin-C exhibited rapid inflammation resolution [47]. Moreover, tenascin-C stimulated the release of pro-inflammatory mediators in explant cultures from RA patients. Interestingly, necrotic cells from SF of RA patients stimulated release of cytokines in RASFs through TLR3 ligation [119]. RA SF and serum also stimulated Chinese hamster ovary (CHO) and human embryonic kidney (HEK)-293 cells overexpressing TLR4 in an LPS-independent manner [120,135]. Notably, IC-containing citrullinated fibrinogen augmented TNF- $\alpha$  release from macrophages via co-stimulation of TLR4 and fragment crystallisable gamma receptor (Fc $\gamma$ R) *in vitro*, providing insights into how citrullination could potentiate the pro-inflammatory effects of DAMPs [146].

### Therapeutic targeting of TLRs

The clinical efficacy of classical RA treatment regimens has significantly improved patient care, but is limited to

certain subsets of patients. Moreover, disease remission remains rare and biologic agents are expensive. Thus there is an urgent need for more effective, cheaper therapeutics [147]. Given the evidence supporting a role for TLRs in RA pathogenesis, these receptors may represent good targets for therapeutic intervention.

Several strategies exist to ablate TLR-triggered inflammatory responses (Fig. 3). Modulation of receptor/ligand interaction can be mediated by soluble decoy receptors and neutralizing antibodies. As DAMPs have been implicated in TLR activation in RA, preventing the release of endogenous ligands is also an option. Additionally, down-regulation of TLR expression may be useful, and the *in vivo* application of siRNA targeting TLR3 has been recently demonstrated [137]. Receptor dimerization is a prerequisite for TLR activation, thus offering another potential approach. Also, molecules serving as intermediary proteins downstream of TLR signalling may be good targets. Therapeutic targeting of TLRs for several pathological conditions, including oncogenesis, infection and autoimmune diseases, has been reviewed elsewhere [148–152]. This review section focuses on the recent advances in inhibiting TLR activation in RA, including

**Fig. 3** Site of action for antagonists of TLR signalling pathways and endogenous activators. Potential strategies to block DAMP-induced inflammatory responses both intracellularly and extracellularly are indicated. TLR4 is shown here as an example of cell surface TLRs. The nature of intervention and the type of inhibitor are indicated.

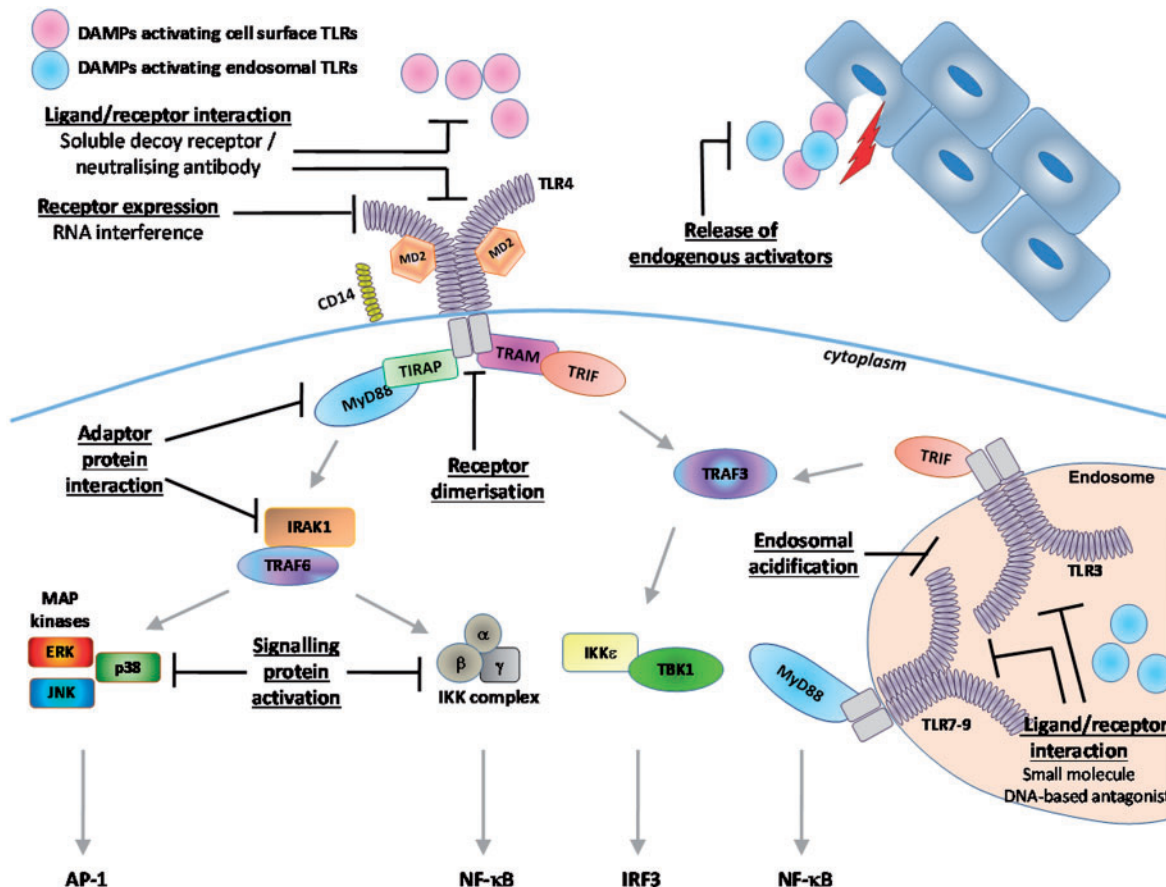

preclinical and clinical studies. A summary of compounds targeting TLRs that are currently being developed by pharmaceutical companies is listed in Table 3.

### Targeting TLR4

Natural TLR antagonists and soluble TLRs (sTLRs) can suppress TLR-mediated inflammation [160–166]. For example, LPS from *Bartonella quintana* and ST2 protein expressed by mast cells and Th cell type 2 (Th2) inhibit TLR4-mediated signalling in experimental models of arthritis, resulting in disease amelioration [160,161]. Other naturally occurring molecules include single-immunoglobulin IL-1 receptor related (SIGIRR) and HSP10/chaperonin 10 [162,167]. SIGIRR, a negative regulator of TLR4 signalling, suppresses cytokine production in cells derived from RA synovium [162]. The recombinant analogue of chaperonin 10, XToll, is now being tested in a Phase II clinical trial for RA treatment given by subcutaneous injection. The adipocytokine C1q/TNF-related protein-3 (CTRP-3) has been shown to inhibit the binding of LPS to TLR4 [166]. Interestingly, a plant derivative, RSCL-0520, when administered *in vivo*, reduced paw swelling in rats [168]. A small carbohydrate molecule developed by the same group specifically inhibits TLR2 and TLR4 [169]. sTLR4 has been reported by several groups to inhibit LPS signalling, but the effects of these soluble receptors have yet to be demonstrated *in vivo* [163–165].

The crystallographic structure of LPS/MD2/CD14 interacting with TLR4 has facilitated the synthesis of inhibitory molecules interrupting this binding, such as MD2 mimetic peptides and a cationic amphiphile compound, the effects of which remain to be determined *in vivo* [170, 171]. Sulforaphane and OSL07, an oxazolidinone derivative, prevent dimerization of TLR4 and suppress downstream signalling activation; the former exhibiting anti-inflammatory properties *in vivo* [172, 173]. mAb NI-0101/ $\alpha$ , developed by NovImmune, has also been found to inhibit TLR4 activation [154].

### Targeting TLR2

Soluble forms of TLR2 have been found in human plasma, breast milk and amniotic fluid [174, 175]. Significantly, sTLR2 is a competent modulator of TLR2-mediated responses in an experimental model of peritoneal inflammation without affecting the host's ability to fight bacterial infection [176]. Opsona Therapeutics is currently developing antibodies targeting TLR2: OPN-305, which abrogates

cytokine release [155], and OPN-301, which inhibits spontaneous cytokine release in human RA explant cultures as efficaciously as anti-TNF- $\alpha$  antibody [177].

### Targeting TLRs 3/7/8/9

Several drugs possess off-target effects on endosomal TLRs 3/7/8/9 in addition to their classical mechanisms of action. The anti-malarial drug chloroquine and related derivatives have long been used as anti-inflammatory drugs in various disorders, including SLE, psoriasis and RA (reviewed in [178]). The underlying mechanism is attributed to the ability of these drugs to suppress the activation of endosomal TLRs, presumably by suppressing endosomal acidification, a fundamental prerequisite for the activation of endosomal receptors. New evidence has also suggested that these drugs might act by binding directly to nucleic acid ligands, thereby masking the receptor-binding domain [179]. Small molecules such as mianserin and imiquimod inhibit the production of TNF- $\alpha$  from human RA synovial membranes; the former inhibits TLRs 3, 7, 8 and 9 while the latter targets TLR8 [124]. VTX-763 is a small molecule inhibitor targeting TLR8 that is being developed by VentiRx Pharmaceuticals; it is currently in the preclinical phase [158]. Interestingly, it has also been recently reported that anti-depressant drugs fluoxetine and citalopram inhibit the endosomal TLRs in addition to their ability to interfere with the serotonin re-uptake process [180]. These psychotropic drugs improved disease outcome in a CIA model and reduced cytokine release from human RA synovial membranes. However, it will be a challenging task to incorporate these drugs into monotherapy applications for autoimmune diseases due to the high doses required and associated adverse effects.

Short DNA oligodeoxyribonucleotides (ODNs) called immunoregulatory sequences (IRSs) also inhibit endosomal TLRs [181–183]. Prophylactic administration of ODNs in CIA and CpG-induced arthritis abrogated disease progression [184, 185]. Idera is now developing a novel DNA-based TLR7/9 antagonist, IMO-3100, that has shown promising results *in vivo* for several autoimmune disease models. Phase I clinical trials involving healthy subjects are under way and so far IMO-3100 is reported to be well tolerated with no major adverse effects, in addition to reducing the release of cytokines such as TNF- $\alpha$  and IL-1 $\beta$  in these subjects. Idera is also exploring the possibility of IMO-3100 for the treatment of RA, SLE and

**TABLE 3** Clinical and preclinical candidates available in inhibiting TLRs for the treatment of RA

| Compound            | Target  | Drug class     | Clinical status | Company                 | Reference |
|---------------------|---------|----------------|-----------------|-------------------------|-----------|
| Chaperonin 10/XToll | TLR4    | Protein        | Phase II        | Cbio Ltd                | [153]     |
| NI-0101/ $\alpha$   | TLR4    | Antibody       | Preclinical     | NovImmune               | [154]     |
| OPN-305             | TLR2    | Antibody       | Preclinical     | Opsona                  | [155]     |
| IMO-3100            | TLR7/9  | DNA-based      | Phase I         | Idera Pharmaceuticals   | [156]     |
| DV-1179             | TLR7/9  | DNA-based      | Preclinical     | Dynavax                 | [157]     |
| VTX-763             | TLR8    | Small molecule | Preclinical     | VentiRx Pharmaceuticals | [158]     |
| SB-681323           | p38MAPK | Small molecule | Phase I         | GlaxoSmithKline         | [159]     |



psoriasis. DV-1179 is another DNA-based compound, developed by Dynavax, for TLR7/9 inhibition [157].

### Targeting downstream signalling mediators

Another approach undertaken to inhibit TLR-mediated responses is to target downstream signalling mediators. Several attempts have been made to inhibit MAPKs in inflammatory diseases, and data obtained from animal studies showed promising results. However, undesirable toxicity revealed during clinical trials rendered these inhibitors impractical as therapeutic agents (reviewed in [186]). Papamimod, a selective p38 MAPK inhibitor, halts disease progression in arthritis animal models, and showed tolerable adverse effects compared with inhibitors of the same kind, but was less efficacious than MTX and without added benefit for patients when given as part of a combination therapy [187, 188]. SB-681323, a p38 MAPK inhibitor developed by GlaxoSmithKline, is currently undergoing trials for the treatment of RA [159]. Newer p38 inhibitors such as PF-3644022 and DBM1285 have recently been reported to be efficacious in several arthritis models, although their clinical application remains to be determined [189, 190].

As part of the NF- $\kappa$ B pathway, intense efforts have also concentrated on targeting I- $\kappa$ B kinase  $\beta$  (IKK $\beta$ ). MLN-0415 is one such compound developed by Millenium Pharmaceuticals Inc. that entered Phase I clinical trial, but was discontinued due to adverse side effects. Several other IKK $\beta$  inhibitors that have been reported to date include ML-120B, SPC-839, DHMEQ and fasudil, all of which have been shown to inhibit the NF- $\kappa$ B pathway and ameliorate disease progression *in vivo* [191–194].

The adaptor proteins that lie upstream of TLR-induced signalling cascades may be better candidates. MyD88 and TRIF lie in closer proximity to the receptor; this might minimize undesirable off-target effects. Although it has yet to be demonstrated in RA, such an approach holds some promise in reducing inflammation. RDP-58, a decapeptide that disrupts TNF- $\alpha$  receptor-associated factor 6 (TRAF6)/MyD88/IL-1R-associated kinase (IRAK) complex formation, exhibits anti-inflammatory properties in several autoimmune disease models [195–197] and has entered Phase II clinical trials for Crohn's disease and ulcerative colitis [198]. Similarly, ST2825, which prevents homodimerization of MyD88, resulting in reduced NF- $\kappa$ B activation and cytokine release in mice [199], suppresses antibody secretion in B cells from SLE patients [200].

### Targeting endogenous activators

Given the aberrant expression of DAMPs in human RA tissues, one potential therapeutic approach may be to directly modulate their activity. Neutralizing antibodies to HMGB1 reduced inflammation in experimental CIA [201], as did a truncated HMGB-1 containing only the A-box region. A low molecular weight compound, SNX-4414, which was developed as an HSP90 inhibitor, completely suppressed collagen-induced rat paw swelling *in vivo* [202]. Another approach may be to limit expression levels of these endogenous ligands. This requires a

good understanding of the molecular mechanism underlying the induction and release of DAMPs. For example, there exist two modes of HMGB1 release from host cells: it may be liberated passively from necrotic cells, or actively secreted by various stimulated cells including monocytes, macrophages, dendritic cells and synovial fibroblasts (reviewed in [203, 204]). A wide range of compounds such as the neurotransmitter acetylcholine [205], plant-derived flavonoid quercetin [206] and phospholipid stearyl lysophosphatidylcholine [207] suppress the release of HMGB1 in experimental sepsis. The exact inhibitory mechanisms of these molecules are still unclear, and whether they are effective in arthritis models remains to be elucidated.

Fragments of ECM components also constitute DAMPs. Inhibiting the mobilization of these endogenous molecules by targeting the proteolytic enzymes that create them may be therapeutically useful. Heparan sulphate proteoglycan is liberated from intact matrices by neutrophil elastase (NE); and *in vivo* administration of NE-induced septic shock in mice via TLR4, resembling the effect of direct heparan sulphate injection [208]. Moreover, an NE inhibitor, ONO-5046, improves disease outcome in CIA animal models [209] and alpha-1 anti-trypsin, which also inhibits NE, greatly suppressed disease onset and progression in mice [210].

### Targeting regulation by microRNAs

MicroRNAs are endogenous RNAs that post-transcriptionally modulate gene expression (reviewed in [211]). MicroRNAs are important immune regulators; each is able to modulate up to several hundreds of inflammatory mediator targets [212, 213]. Not surprisingly, regulation of gene expression by microRNAs has also been extended to the TLR signalling paradigm (reviewed in [214]). MicroRNAs impose several levels of regulation on the TLR signalling axis, for example, miR-155, miR-21 and miR-147 regulate the expression of TLRs 2–4, downstream signalling mediators such as MyD88 and TRIF, as well as transcription factors NF- $\kappa$ B and IFN response factor 3 (IRF3) (reviewed in [214]). Conversely, miR-21 is a key regulator of inflammatory gene synthesis downstream of LPS activation of TLR4 [215]. Recent studies have reported that miR-155, miR-146a and miR-203 are up-regulated in RASFs, resulting in altered cytokine and MMP synthesis [216–218]. These insights may create a novel approach to limiting excessive TLR activation during inflammation.

## Conclusions and future perspectives

Evidence from animal models and human explants highlights a role for TLR2, TLR3, TLR4 and TLR8 in the pathogenesis of RA. Effective targeting of these TLRs will be facilitated by greater knowledge of the biochemical properties and precise molecular interactions between receptor and agonist. This may be helped by computational homology modelling in the absence of many crystal structures [219]. The identity of key pathogenic DAMPs also remains unclear and it is not known how each or all contribute to RA. It will be essential to elucidate if targeting

one specific DAMP will suffice for disease amelioration or if it is more appropriate to target downstream signalling pathways shared by many DAMPs. We also require in-depth knowledge of the molecular interaction of DAMPs with their respective TLRs, in addition to the adaptor proteins and the signalling cascades involved.

It is also tempting to speculate to what extent TLRs might interact or work cooperatively with each other during RA. Some TLRs cooperate with each other in a context-specific manner, resulting in enhanced production of selective downstream target genes [120, 220, 221]. For example, co-stimulation of TLR2 and TLR4 in murine dendritic cells (DCs) leads to enhanced production of IL10, but not TNF- $\alpha$  [220]. Up-regulation of TNF- $\alpha$  and IL-6 expression was observed during combined stimulation of TLR2 and TLR3, while stimulation of TLR2 suppresses the induction of type I IFN-stimulated genes by TLR3 [221]. Co-stimulation of DCs from RA patients with TLR4 and TLR3-7/8 agonists results in synergistic cytokine release [120]. TLRs may also be involved in heterologous receptor activation. For instance, TLR4 interacts with a G protein-coupled receptor, proteinase-activated receptor (PAR)-2 [222]. PAR-2 has been implicated in several diseases, including joint inflammation (reviewed in [223]). Stimulation of PAR-2 results in NF- $\kappa$ B activation, and in the presence of TLR4 agonist the response is enhanced, leading to synergistic cytokine expression [222, 224]. Further studies showed that such cross-regulation might extend to TLR3 and downstream IRF and signal transducer and activator of transcription (STAT) signalling [225]. Strikingly, in TLR4<sup>-/-</sup> and MyD88<sup>-/-</sup> mice, PAR-2 agonist-induced footpad oedema was significantly reduced compared with controls [225]. This provides an *in vivo* correlation of TLR4 and PAR-2 signalling in the context of joint inflammation. Thus TLRs may be involved in distinct novel signalling paradigms, which still remain largely elusive.

Great advances in the past decade have increased our understanding of the role of TLRs in RA pathogenesis. Although there are still substantial gaps in our knowledge, targeting TLRs or their activation by endogenous danger signals represents an attractive therapeutic option. RA is a heterogeneous disorder associated with an unpredictable pattern of therapy response. With the aid of robust biomarkers and molecular signatures, pharmacogenetic identification leading to personalized medicine and effective drug-targeting disease remission might be possible.

#### Rheumatology key messages

- TLR activation drives persistent inflammation in RA.
- Endogenous molecules generated upon tissue damage may drive TLR activation in RA.
- Targeting TLR activation could provide novel strategies to treat RA and improve patient care.

## Acknowledgements

**Funding:** This work was supported by Arthritis Research UK and the Medical Research Council (K.S.M.) as well as a University of Sharjah Seed Research Grant (F.G.G.).

**Disclosure statement:** K.S.M. has filed patents around inhibiting DAMP function for therapy and has received funding from NovImmune. The other author has declared no conflicts of interest.

## References

- 1 Klarenbeek NB, Kerstens PJ, Huizinga TW, Dijkman BA, Allaart CF. Recent advances in the management of rheumatoid arthritis. *Br Med J* 2010;341:c6942.
- 2 Sokka T, Abelson B, Pincus T. Mortality in rheumatoid arthritis: 2008 update. *Clin Exp Rheumatol* 2008; 26(Suppl. 51):S35–61.
- 3 Feldmann M, Maini SR. Role of cytokines in rheumatoid arthritis: an education in pathophysiology and therapeutics. *Immunol Rev* 2008;223:7–19.
- 4 Bromley M, Woolley DE. Histopathology of the rheumatoid lesion. Identification of cell types at sites of cartilage erosion. *Arthritis Rheum* 1984;27:857–63.
- 5 Shimizu S, Shiozawa S, Shiozawa K, Imura S, Fujita T. Quantitative histologic studies on the pathogenesis of periarticular osteoporosis in rheumatoid arthritis. *Arthritis Rheum* 1985;28:25–31.
- 6 Shiozawa S, Tsumiyama K, Yoshida K, Hashiramoto A. Pathogenesis of joint destruction in rheumatoid arthritis. *Arch Immunol Ther Exp* 2011;59:89–95.
- 7 Brennan FM, McInnes IB. Evidence that cytokines play a role in rheumatoid arthritis. *J Clin Invest* 2008;118: 3537–45.
- 8 Van Boxtel JA, Paget SA. Predominantly T-cell infiltrate in rheumatoid synovial membranes. *N Engl J Med* 1975;293: 517–20.
- 9 Kremer JM, Westhovens R, Leon M *et al.* Treatment of rheumatoid arthritis by selective inhibition of T-cell activation with fusion protein CTLA4Ig. *N Engl J Med* 2003; 349:1907–15.
- 10 Chabaud M, Durand JM, Buchs N *et al.* Human interleukin-17: a T cell-derived proinflammatory cytokine produced by the rheumatoid synovium. *Arthritis Rheum* 1999;42:963–70.
- 11 van den Berg WB, Miossec P. IL-17 as a future therapeutic target for rheumatoid arthritis. *Nat Rev Rheumatol* 2009;5: 549–53.
- 12 Emery P, Fleischmann R, Filipowicz-Sosnowska A *et al.* The efficacy and safety of rituximab in patients with active rheumatoid arthritis despite methotrexate treatment: results of a phase IIB randomized, double-blind, placebo-controlled, dose-ranging trial. *Arthritis Rheum* 2006;54:1390–400.
- 13 van Vollenhoven RF. Treatment of rheumatoid arthritis: state of the art 2009. *Nat Rev Rheumatol* 2009;5:531–41.
- 14 Kochi Y, Suzuki A, Yamada R, Yamamoto K. Ethnogenetic heterogeneity of rheumatoid arthritis-implications for pathogenesis. *Nat Rev Rheumatol* 2010;6:290–5.
- 15 Padyukov L, Silva C, Stolt P, Alfredsson L, Klareskog L. A gene-environment interaction between smoking and shared epitope genes in HLA-DR provides a high risk of seropositive rheumatoid arthritis. *Arthritis Rheum* 2004;50: 3085–92.
- 16 Chujo S, Okamoto S, Sunahara R *et al.* Cigarette smoke condensate extracts augment collagen-induced arthritis in mice. *Int Immunopharmacol* 2010;10:1194–9.

- 17 Okamoto S, Adachi M, Chujo S *et al.* Etiological role of cigarette smoking in rheumatoid arthritis: Nasal exposure to cigarette smoke condensate extracts augments the development of collagen-induced arthritis in mice. *Biochem Biophys Res Commun* 2011;404:1088–92.
- 18 Hashimoto C, Hudson KL, Anderson KV. The Toll gene of *Drosophila*, required for dorsal-ventral embryonic polarity, appears to encode a transmembrane protein. *Cell* 1988; 52:269–79.
- 19 Shi Z, Cai Z, Sanchez A *et al.* A novel Toll-like receptor that recognizes vesicular stomatitis virus. *J Biol Chem* 2011; 286:4517–24.
- 20 O'Neill LA. The interleukin-1 receptor/Toll-like receptor superfamily: 10 years of progress. *Immunol Rev* 2008;226: 10–8.
- 21 Ostuni R, Zanoni I, Granucci F. Deciphering the complexity of Toll-like receptor signaling. *Cell Mol Life Sci* 2010;67:4109–34.
- 22 Medzhitov R, Preston-Hurlburt P, Janeway CA Jr. A human homologue of the *Drosophila* Toll protein signals activation of adaptive immunity. *Nature* 1997;388:394–7.
- 23 Akashi-Takamura S, Miyake K. TLR accessory molecules. *Curr Opin Immunol* 2008;20:420–5.
- 24 Hasan U, Chaffois C, Gaillard C *et al.* Human TLR10 is a functional receptor, expressed by B cells and plasmacytoid dendritic cells, which activates gene transcription through MyD88. *J Immunol* 2005;174:2942–50.
- 25 Guan Y, Ranao DR, Jiang S *et al.* Human TLRs 10 and 1 share common mechanisms of innate immune sensing but not signaling. *J Immunol* 2010;184:5094–103.
- 26 Seong SY, Matzinger P. Hydrophobicity: an ancient damage-associated molecular pattern that initiates innate immune responses. *Nat Rev Immunol* 2004;4:469–78.
- 27 Ionita MG, Arslan F, de Kleijn DP, Pasterkamp G. Endogenous inflammatory molecules engage Toll-like receptors in cardiovascular disease. *J Innate Immun* 2010;2: 307–15.
- 28 Srikrishna G, Freeze HH. Endogenous damage-associated molecular pattern molecules at the crossroads of inflammation and cancer. *Neoplasia* 2009; 11:615–28.
- 29 Foell D, Witkowski H, Roth J. Mechanisms of disease: a 'DAMP' view of inflammatory arthritis. *Nat Clin Pract Rheumatol* 2007;3:382–90.
- 30 Sims GP, Rowe DC, Rietdijk ST, Herbst R, Coyle AJ. HMGB1 and RAGE in inflammation and cancer. *Annu Rev Immunol* 2010;28:367–88.
- 31 Marsh BJ, Williams-Karnesky RL, Stenzel-Poore MP. Toll-like receptor signaling in endogenous neuroprotection and stroke. *Neuroscience* 2009;158:1007–20.
- 32 Funderburg N, Lederman MM, Feng Z *et al.* Human - defensin-3 activates professional antigen-presenting cells via Toll-like receptors 1 and 2. *Proc Natl Acad Sci USA* 2007;104:18631–5.
- 33 Asea A, Rehli M, Kabingu E *et al.* Novel signal transduction pathway utilized by extracellular HSP70: role of Toll-like receptor (TLR) 2 and TLR4. *J Biol Chem* 2002;277: 15028–34.
- 34 Vabulas RM, Braedel S, Hilf N *et al.* The endoplasmic reticulum-resident heat shock protein Gp96 activates dendritic cells via the Toll-like receptor 2/4 pathway. *J Biol Chem* 2002;277:20847–53.
- 35 Sato M, Sano H, Iwaki D *et al.* Direct binding of Toll-like receptor 2 to zymosan, and zymosan-induced NF-kappa B activation and TNF-alpha secretion are down-regulated by lung collectin surfactant protein A. *J Immunol* 2003; 171:417–25.
- 36 Park JS, Svetkauskaite D, He Q *et al.* Involvement of Toll-like receptors 2 and 4 in cellular activation by high mobility group box 1 protein. *J Biol Chem* 2004;279: 7370–7.
- 37 Park JS, Gamboni-Robertson F, He Q *et al.* High mobility group box 1 protein interacts with multiple Toll-like receptors. *Am J Physiol Cell Physiol* 2006;290:C917–24.
- 38 Means TK, Latz E, Hayashi F, Murali MR, Golenbock DT, Luster AD. Human lupus autoantibody-DNA complexes activate DCs through cooperation of CD32 and TLR9. *J Clin Invest* 2005;115:407–17.
- 39 Murakami S, Iwaki D, Mitsuzawa H *et al.* Surfactant protein A inhibits peptidoglycan-induced tumor necrosis factor-alpha secretion in U937 cells and alveolar macrophages by direct interaction with Toll-like receptor 2. *J Biol Chem* 2002;277:6830–7.
- 40 Ohya M, Nishitani C, Sano H *et al.* Human pulmonary surfactant protein D binds the extracellular domains of Toll-like receptors 2 and 4 through the carbohydrate recognition domain by a mechanism different from its binding to phosphatidylinositol and lipopolysaccharide. *Biochemistry* 2006;45:8657–64.
- 41 Yang D, Chen Q, Su SB *et al.* Eosinophil-derived neurotoxin acts as an alarmin to activate the TLR2-MyD88 signal pathway in dendritic cells and enhances Th2 immune responses. *J Exp Med* 2008;205:79–90.
- 42 Satta N, Dunoyer-Geindre S, Reber G *et al.* The role of TLR2 in the inflammatory activation of mouse fibroblasts by human antiphospholipid antibodies. *Blood* 2007;109: 1507–14.
- 43 Zhang P, Cox CJ, Alvarez KM, Cunningham MW. Cutting edge: cardiac myosin activates innate immune responses through TLRs. *J Immunol* 2009;183:27–31.
- 44 Park HD, Lee Y, Oh YK *et al.* Pancreatic adenocarcinoma upregulated factor promotes metastasis by regulating TLR/CXCR4 activation. *Oncogene* 2011;30:201–11.
- 45 Okamura Y, Watari M, Jerud ES *et al.* The extra domain A of fibronectin activates Toll-like receptor 4. *J Biol Chem* 2001;276:10229–33.
- 46 Smiley ST, King JA, Hancock WW. Fibrinogen stimulates macrophage chemokine secretion through Toll-like receptor 4. *J Immunol* 2001;167:2887–94.
- 47 Midwood K, Sacre S, Piccinini AM *et al.* Tenascin-C is an endogenous activator of Toll-like receptor 4 that is essential for maintaining inflammation in arthritic joint disease. *Nat Med* 2009;15:774–80.
- 48 Guillot L, Balloy V, McCormack FX, Golenbock DT, Chignard M, Si-Tahar M. Cutting edge: the immunostimulatory activity of the lung surfactant protein-A involves Toll-like receptor 4. *J Immunol* 2002;168:5989–92.
- 49 Biragyn A, Ruffini PA, Leifer CA *et al.* Toll-like receptor 4-dependent activation of dendritic cells by beta-defensin 2. *Science* 2002;298:1025–9.
- 50 Ohashi K, Burkart V, Flohe S, Kolb H. Cutting edge: heat shock protein 60 is a putative endogenous ligand of the Toll-like receptor-4 complex. *J Immunol* 2000;164: 558–61.



- 51 Vabulas RM, Ahmad-Nejad P, Ghose S, Kirschning CJ, Issels RD, Wagner H. HSP70 as endogenous stimulus of the Toll/interleukin-1 receptor signal pathway. *J Biol Chem* 2002;277:15107–12.
- 52 Roelofs MF, Boelens WC, Joosten LA *et al.* Identification of small heat shock protein B8 (HSP22) as a novel TLR4 ligand and potential involvement in the pathogenesis of rheumatoid arthritis. *J Immunol* 2006;176:7021–7.
- 53 Wheeler DS, Chase MA, Senft AP, Poynter SE, Wong HR, Page K. Extracellular Hsp72, an endogenous DAMP, is released by virally infected airway epithelial cells and activates neutrophils via Toll-like receptor (TLR)-4. *Respir Res* 2009;10:31.
- 54 Foell D, Wittkowski H, Vogl T, Roth J. S100 proteins expressed in phagocytes: a novel group of damage-associated molecular pattern molecules. *J Leukoc Biol* 2007;81:28–37.
- 55 Vogl T, Tenbrock K, Ludwig S *et al.* Mrp8 and Mrp14 are endogenous activators of Toll-like receptor 4, promoting lethal, endotoxin-induced shock. *Nat Med* 2007;13:1042–9.
- 56 Devaney JM, Greene CM, Taggart CC, Carroll TP, O'Neill SJ, McElvaney NG. Neutrophil elastase up-regulates interleukin-8 via Toll-like receptor 4. *FEBS Lett* 2003;544:129–32.
- 57 Mulla MJ, Brosens JJ, Chamley LW *et al.* Antiphospholipid antibodies induce a pro-inflammatory response in first trimester trophoblast via the TLR4/MyD88 pathway. *Am J Reprod Immunol* 2009;62:96–111.
- 58 Pierangeli SS, Vega-Ostertag ME, Raschi E *et al.* Toll-like receptor and antiphospholipid mediated thrombosis: in vivo studies. *Ann Rheum Dis* 2007;66:1327–33.
- 59 Curran CS, Demick KP, Mansfield JM. Lactoferrin activates macrophages via TLR4-dependent and -independent signaling pathways. *Cell Immunol* 2006;242:23–30.
- 60 Tarkowski A, Bjersing J, Shestakov A, Bokarewa MI. Resistin competes with lipopolysaccharide for binding to Toll-like receptor 4. *J Cell Mol Med* 2010;14:1419–31.
- 61 Hurst J, Prinz N, Lorenz M *et al.* TLR7 and TLR8 ligands and antiphospholipid antibodies show synergistic effects on the induction of IL-1 $\beta$  and caspase-1 in monocytes and dendritic cells. *Immunobiology* 2009;214:683–91.
- 62 Doring Y, Hurst J, Lorenz M *et al.* Human antiphospholipid antibodies induce TNF $\alpha$  in monocytes via Toll-like receptor 8. *Immunobiology* 2010;215:230–41.
- 63 He RL, Zhou J, Hanson CZ, Chen J, Cheng N, Ye RD. Serum amyloid A induces G-CSF expression and neutrophilia via Toll-like receptor 2. *Blood* 2009;113:429–37.
- 64 Cheng N, He R, Tian J, Ye PP, Ye RD. Cutting edge: TLR2 is a functional receptor for acute-phase serum amyloid A. *J Immunol* 2008;181:22–6.
- 65 West XZ, Malinin NL, Merkulova AA *et al.* Oxidative stress induces angiogenesis by activating TLR2 with novel endogenous ligands. *Nature* 2010;467:972–6.
- 66 Sandri S, Rodriguez D, Gomes E, Monteiro HP, Russo M, Campa A. Is serum amyloid A an endogenous TLR4 agonist? *J Leukoc Biol* 2008;83:1174–80.
- 67 Hiratsuka S, Watanabe A, Sakurai Y *et al.* The S100A8-serum amyloid A3-TLR4 paracrine cascade establishes a pre-metastatic phase. *Nat Cell Biol* 2008;10:1349–55.
- 68 Xu XH, Shah PK, Faure E *et al.* Toll-like receptor-4 is expressed by macrophages in murine and human lipid-rich atherosclerotic plaques and upregulated by oxidized LDL. *Circulation* 2001;104:3103–8.
- 69 Bae YS, Lee JH, Choi SH *et al.* Macrophages generate reactive oxygen species in response to minimally oxidized low-density lipoprotein: Toll-like receptor 4- and spleen tyrosine kinase-dependent activation of NADPH oxidase 2. *Circ Res* 2009;104:210–8, 21p following 8.
- 70 Miller YI, Viriyakosol S, Binder CJ, Feramisco JR, Kirkland TN, Witztum JL. Minimally modified LDL binds to CD14, induces macrophage spreading via TLR4/MD-2, and inhibits phagocytosis of apoptotic cells. *J Biol Chem* 2003;278:1561–8.
- 71 Shi H, Kokoeva MV, Inouye K, Tzameli I, Yin H, Flier JS. TLR4 links innate immunity and fatty acid-induced insulin resistance. *J Clin Invest* 2006;116:3015–25.
- 72 Schaeffler A, Gross P, Buettner R *et al.* Fatty acid-induced induction of Toll-like receptor-4/nuclear factor- $\kappa$ B pathway in adipocytes links nutritional signalling with innate immunity. *Immunology* 2009;126:233–45.
- 73 Schaefer L, Babelova A, Kiss E *et al.* The matrix component biglycan is proinflammatory and signals through Toll-like receptors 4 and 2 in macrophages. *J Clin Invest* 2005;115:2223–33.
- 74 Kim S, Takahashi H, Lin WW *et al.* Carcinoma-produced factors activate myeloid cells through TLR2 to stimulate metastasis. *Nature* 2009;457:102–6.
- 75 Termeer C, Benedix F, Sleeman J *et al.* Oligosaccharides of hyaluronan activate dendritic cells via Toll-like receptor 4. *J Exp Med* 2002;195:99–111.
- 76 Johnson GB, Brunn GJ, Kodaira Y, Platt JL. Receptor-mediated monitoring of tissue well-being via detection of soluble heparan sulfate by Toll-like receptor 4. *J Immunol* 2002;168:5233–9.
- 77 Liu-Bryan R, Scott P, Sydlaske A, Rose DM, Terkeltaub R. Innate immunity conferred by Toll-like receptors 2 and 4 and myeloid differentiation factor 88 expression is pivotal to monosodium urate monohydrate crystal-induced inflammation. *Arthritis Rheum* 2005;52:2936–46.
- 78 Liu-Bryan R, Pritzker K, Firestein GS, Terkeltaub R. TLR2 signaling in chondrocytes drives calcium pyrophosphate dihydrate and monosodium urate crystal-induced nitric oxide generation. *J Immunol* 2005;174:5016–23.
- 79 Kariko K, Ni H, Capodici J, Lamphier M, Weissman D. mRNA is an endogenous ligand for Toll-like receptor 3. *J Biol Chem* 2004;279:12542–50.
- 80 Vollmer J, Tluk S, Schmitz C *et al.* Immune stimulation mediated by autoantigen binding sites within small nuclear RNAs involves Toll-like receptors 7 and 8. *J Exp Med* 2005;202:1575–85.
- 81 Leadbetter EA, Rifkin IR, Hohlbaum AM, Beaudette BC, Shlomchik MJ, Marshak-Rothstein A. Chromatin-IgG complexes activate B cells by dual engagement of IgM and Toll-like receptors. *Nature* 2002;416:603–7.
- 82 O'Neill LA, Bowie AG. The family of five: TIR-domain-containing adaptors in Toll-like receptor signalling. *Nat Rev Immunol* 2007;7:353–64.
- 83 Heguy A, Baldari CT, Macchia G, Telford JL, Melli M. Amino acids conserved in interleukin-1 receptors (IL-1Rs) and the *Drosophila* Toll protein are essential for IL-1R signal transduction. *J Biol Chem* 1992;267:2605–9.



- 84 Rock FL, Hardiman G, Timans JC, Kastelein RA, Bazan JF. A family of human receptors structurally related to *Drosophila* Toll. *Proc Natl Acad Sci USA* 1998; 95:588–93.
- 85 Lasker MV, Nair SK. Intracellular TLR signaling: a structural perspective on human disease. *J Immunol* 2006; 177:11–6.
- 86 Coll RC, O'Neill LA. New insights into the regulation of signalling by Toll-like receptors and nod-like receptors. *J Innate Immun* 2010;2:406–21.
- 87 Yamamoto M, Takeda K, Akira S. TIR domain-containing adaptors define the specificity of TLR signaling. *Mol Immunol* 2004;40:861–8.
- 88 Yamamoto M, Sato S, Hemmi H *et al.* TRAM is specifically involved in the Toll-like receptor 4-mediated MyD88-independent signaling pathway. *Nat Immunol* 2003;4:1144–50.
- 89 West AP, Kobiansky AA, Ghosh S. Recognition and signaling by Toll-like receptors. *Annu Rev Cell Dev Biol* 2006;22:409–37.
- 90 Jin MS, Kim SE, Heo JY *et al.* Crystal structure of the TLR1-TLR2 heterodimer induced by binding of a tri-acylated lipopeptide. *Cell* 2007;130:1071–82.
- 91 Kang JY, Nan X, Jin MS *et al.* Recognition of lipopeptide patterns by Toll-like receptor 2-Toll-like receptor 6 heterodimer. *Immunity* 2009;31:873–84.
- 92 Kim HM, Park BS, Kim JI *et al.* Crystal structure of the TLR4-MD-2 complex with bound endotoxin antagonist Eritoran. *Cell* 2007;130:906–17.
- 93 Liu L, Botos I, Wang Y *et al.* Structural basis of Toll-like receptor 3 signaling with double-stranded RNA. *Science* 2008;320:379–81.
- 94 Park BS, Song DH, Kim HM, Choi BS, Lee H, Lee JO. The structural basis of lipopolysaccharide recognition by the TLR4-MD-2 complex. *Nature* 2009;458:1191–5.
- 95 Tanabe M, Nimigeam CM, Iverson TM. Structural basis for solute transport, nucleotide regulation, and immunological recognition of *Neisseria meningitidis* PorB. *Proc Natl Acad Sci USA* 2010;107:6811–6.
- 96 Codolo G, Papinutto E, Polenghi A, D'Elia MM, Zanotti G, de Bernard M. Structure and immunomodulatory property relationship in NapA of *Borrelia burgdorferi*. *Biochim Biophys Acta* 2010;1804:2191–7.
- 97 Yu S, Lee NY, Park SJ, Rhee S. Crystal structure of Toll-like receptor 2-activating lipoprotein lipA from *Vibrio vulnificus*. *Proteins* 2011;79:1020–5.
- 98 Drage MG, Tsai HC, Pecora ND *et al.* Mycobacterium tuberculosis lipoprotein LprG (Rv1411c) binds triacylated glycolipid agonists of Toll-like receptor 2. *Nat Struct Mol Biol* 2010;17:1088–95.
- 99 Piccinini AM, Midwood KS. DAMPening inflammation by modulating TLR signalling. *Mediators Inflamm* 2010; doi:10.1155/2010/672395.
- 100 Hodgkinson CP, Patel K, Ye S. Functional Toll-like receptor 4 mutations modulate the response to fibrinogen. *Thromb Haemost* 2008;100:301–7.
- 101 Babelova A, Moreth K, Tsalastra-Greul W *et al.* Biglycan, a danger signal that activates the NLRP3 inflammasome via Toll-like and P2X receptors. *J Biol Chem* 2009;284: 24035–48.
- 102 Kol A, Lichtman AH, Finberg RW, Libby P, Kurt-Jones EA. Cutting edge: heat shock protein (HSP) 60 activates the innate immune response: CD14 is an essential receptor for HSP60 activation of mononuclear cells. *J Immunol* 2000;164:13–7.
- 103 Taylor KR, Yamasaki K, Radek KA *et al.* Recognition of hyaluronan released in sterile injury involves a unique receptor complex dependent on Toll-like receptor 4, CD44, and MD-2. *J Biol Chem* 2007;282:18265–75.
- 104 Stewart CR, Stuart LM, Wilkinson K *et al.* CD36 ligands promote sterile inflammation through assembly of a Toll-like receptor 4 and 6 heterodimer. *Nat Immunol* 2010;11:155–61.
- 105 Ganguly D, Chamilos G, Lande R *et al.* Self-RNA-antimicrobial peptide complexes activate human dendritic cells through TLR7 and TLR8. *J Exp Med* 2009;206:1983–94.
- 106 Lau CM, Broughton C, Tabor AS *et al.* RNA-associated autoantigens activate B cells by combined B cell antigen receptor/Toll-like receptor 7 engagement. *J Exp Med* 2005;202:1171–7.
- 107 Lande R, Gregorio J, Facchinetti V *et al.* Plasmacytoid dendritic cells sense self-DNA coupled with antimicrobial peptide. *Nature* 2007;449:564–9.
- 108 Viglianti GA, Lau CM, Hanley TM, Miko BA, Shlomchik MJ, Marshak-Rothstein A. Activation of autoreactive B cells by CpG dsDNA. *Immunity* 2003;19: 837–47.
- 109 Urbonaviciute V, Furnrohr BG, Meister S *et al.* Induction of inflammatory and immune responses by HMGB1-nucleosome complexes: implications for the pathogenesis of SLE. *J Exp Med* 2008;205:3007–18.
- 110 Tian J, Avalos AM, Mao SY *et al.* Toll-like receptor 9-dependent activation by DNA-containing immune complexes is mediated by HMGB1 and RAGE. *Nat Immunol* 2007;8:487–96.
- 111 Silva E, Arcaroli J, He Q *et al.* HMGB1 and LPS induce distinct patterns of gene expression and activation in neutrophils from patients with sepsis-induced acute lung injury. *Intensive Care Med* 2007;33:1829–39.
- 112 Youn JH, Oh YJ, Kim ES, Choi JE, Shin JS. High mobility group box 1 protein binding to lipopolysaccharide facilitates transfer of lipopolysaccharide to CD14 and enhances lipopolysaccharide-mediated TNF- $\alpha$  production in human monocytes. *J Immunol* 2008;180: 5067–74.
- 113 Hreggvidsdottir HS, Ostberg T, Wahamäa H *et al.* The alarmin HMGB1 acts in synergy with endogenous and exogenous danger signals to promote inflammation. *J Leukoc Biol* 2009;86:655–62.
- 114 Warger T, Hilf N, Rechtsteiner G *et al.* Interaction of TLR2 and TLR4 ligands with the N-terminal domain of Gp96 amplifies innate and adaptive immune responses. *J Biol Chem* 2006;281:22545–53.
- 115 Ospelt C, Brentano F, Rengel Y *et al.* Overexpression of Toll-like receptors 3 and 4 in synovial tissue from patients with early rheumatoid arthritis: Toll-like receptor expression in early and longstanding arthritis. *Arthritis Rheum* 2008;58:3684–92.
- 116 Seibl R, Birchler T, Loeliger S *et al.* Expression and regulation of Toll-like receptor 2 in rheumatoid arthritis synovium. *Am J Pathol* 2003;162:1221–7.
- 117 Huang Q, Ma Y, Adebayo A, Pope RM. Increased macrophage activation mediated through Toll-like

- receptors in rheumatoid arthritis. *Arthritis Rheum* 2007; 56:2192–201.
- 118 Kim KW, Cho ML, Lee SH *et al*. Human rheumatoid synovial fibroblasts promote osteoclastogenic activity by activating RANKL via TLR-2 and TLR-4 activation. *Immunol Lett* 2007;110:54–64.
  - 119 Brentano F, Schorr O, Gay RE, Gay S, Kyburz D. RNA released from necrotic synovial fluid cells activates rheumatoid arthritis synovial fibroblasts via Toll-like receptor 3. *Arthritis Rheum* 2005;52:2656–65.
  - 120 Roelofs MF, Joosten LA, Abdollahi-Roodsaz S *et al*. The expression of Toll-like receptors 3 and 7 in rheumatoid arthritis synovium is increased and costimulation of Toll-like receptors 3, 4, and 7/8 results in synergistic cytokine production by dendritic cells. *Arthritis Rheum* 2005;52:2313–22.
  - 121 Kim KW, Cho ML, Oh HJ *et al*. TLR-3 enhances osteoclastogenesis through upregulation of RANKL expression from fibroblast-like synoviocytes in patients with rheumatoid arthritis. *Immunol Lett* 2009; 124:9–17.
  - 122 Sacre SM, Andreaskos E, Kiriakidis S *et al*. The Toll-like receptor adaptor proteins MyD88 and Mal/TIRAP contribute to the inflammatory and destructive processes in a human model of rheumatoid arthritis. *Am J Pathol* 2007;170:518–25.
  - 123 Wu CY, Chi PL, Hsieh HL, Luo SF, Yang CM. TLR4-dependent induction of vascular adhesion molecule-1 in rheumatoid arthritis synovial fibroblasts: roles of cytosolic phospholipase A(2)alpha/cyclooxygenase-2. *J Cell Physiol* 2010;223:480–91.
  - 124 Sacre SM, Lo A, Gregory B *et al*. Inhibitors of TLR8 reduce TNF production from human rheumatoid synovial membrane cultures. *J Immunol* 2008;181:8002–9.
  - 125 Tamaki Y, Takakubo Y, Hirayama T *et al*. Expression of Toll-like receptors and their signaling pathways in rheumatoid synovitis. *J Rheumatol* 2011;38:810–20.
  - 126 Deng GM, Nilsson IM, Verdrengh M, Collins LV, Tarkowski A. Intra-articularly localized bacterial DNA containing CpG motifs induces arthritis. *Nat Med* 1999;5: 702–5.
  - 127 Cromartie WJ, Craddock JG, Schwab JH, Anderle SK, Yang CH. Arthritis in rats after systemic injection of streptococcal cells or cell walls. *J Exp Med* 1977;146: 1585–602.
  - 128 Williams RO. Models of rheumatoid arthritis. *Ernst Schering Res Found Workshop* 2005;50:89–117.
  - 129 Frasnelli ME, Tarussio D, Chobaz-Peclat V, Busso N, So A. TLR2 modulates inflammation in zymosan-induced arthritis in mice. *Arthritis Res Ther* 2005;7:R370–9.
  - 130 Lee EK, Kang SM, Paik DJ, Kim JM, Youn J. Essential roles of Toll-like receptor-4 signaling in arthritis induced by type II collagen antibody and LPS. *Int Immunol* 2005; 17:325–33.
  - 131 Joosten LA, Koenders MI, Smeets RL *et al*. Toll-like receptor 2 pathway drives streptococcal cell wall-induced joint inflammation: critical role of myeloid differentiation factor 88. *J Immunol* 2003;171:6145–53.
  - 132 Choe JY, Crain B, Wu SR, Corr M. Interleukin 1 receptor dependence of serum transferred arthritis can be circumvented by Toll-like receptor 4 signaling. *J Exp Med* 2003;197:537–42.
  - 133 Nakae S, Saijo S, Horai R, Sudo K, Mori S, Iwakura Y. IL-17 production from activated T cells is required for the spontaneous development of destructive arthritis in mice deficient in IL-1 receptor antagonist. *Proc Natl Acad Sci USA* 2003;100:5986–90.
  - 134 Koenders MI, Devesa I, Marijnissen RJ *et al*. Interleukin-1 drives pathogenic Th17 cells during spontaneous arthritis in interleukin-1 receptor antagonist-deficient mice. *Arthritis Rheum* 2008;58: 3461–70.
  - 135 Abdollahi-Roodsaz S, Joosten LA, Koenders MI *et al*. Stimulation of TLR2 and TLR4 differentially skews the balance of T cells in a mouse model of arthritis. *J Clin Invest* 2008;118:205–16.
  - 136 Hayashi T, Gray CS, Chan M *et al*. Prevention of autoimmune disease by induction of tolerance to Toll-like receptor 7. *Proc Natl Acad Sci USA* 2009;106: 2764–9.
  - 137 Meng L, Zhu W, Jiang C *et al*. Toll-like receptor 3 upregulation in macrophages participates in the initiation and maintenance of pristane-induced arthritis in rats. *Arthritis Res Ther* 2010;12:R103.
  - 138 Heil F, Hemmi H, Hochrein H *et al*. Species-specific recognition of single-stranded RNA via Toll-like receptor 7 and 8. *Science* 2004;303:1526–9.
  - 139 Lundberg AM, Drexler SK, Monaco C *et al*. Key differences in TLR3/poly I:C signaling and cytokine induction by human primary cells: a phenomenon absent from murine cell systems. *Blood* 2007;110:3245–52.
  - 140 Goh FG, Thomson SJ, Krausgruber T, Lanfrancotti A, Copley RR, Udalova IA. Beyond the enhanceosome: cluster of novel kappaB sites downstream of the human IFN-beta gene is essential for lipopolysaccharide-induced gene activation. *Blood* 2010;116:5580–8.
  - 141 Schmidt M, Raghavan B, Muller V *et al*. Crucial role for human Toll-like receptor 4 in the development of contact allergy to nickel. *Nat Immunol* 2010;11:814–9.
  - 142 Stahl HD, Hubner B, Seidl B *et al*. Detection of multiple viral DNA species in synovial tissue and fluid of patients with early arthritis. *Ann Rheum Dis* 2000;59:342–6.
  - 143 van der Heijden IM, Wilbrink B, Tchetverikov I *et al*. Presence of bacterial DNA and bacterial peptidoglycans in joints of patients with rheumatoid arthritis and other arthritides. *Arthritis Rheum* 2000;43:593–8.
  - 144 Schumacher HR Jr, Arayssi T, Crane M *et al*. Chlamydia trachomatis nucleic acids can be found in the synovium of some asymptomatic subjects. *Arthritis Rheum* 1999; 42:1281–4.
  - 145 Gondokaryono SP, Ushio H, Niyonsaba F *et al*. The extra domain A of fibronectin stimulates murine mast cells via Toll-like receptor 4. *J Leukoc Biol* 2007;82: 657–65.
  - 146 Sokolove J, Zhao X, Chandra PE, Robinson WH. Immune complexes containing citrullinated fibrinogen costimulate macrophages via Toll-like receptor 4 and Fc gamma receptor. *Arthritis Rheum* 2011;63:53–62.
  - 147 Lipsky PE. Are new agents needed to treat RA? *Nat Rev Rheumatol* 2009;5:521–2.
  - 148 Hedayat M, Takeda K, Rezaei N. Prophylactic and therapeutic implications of Toll-like receptor ligands. *Med Res Rev* 2010; doi:10.1002/med.20214.

- 149 Basith S, Manavalan B, Lee G, Kim SG, Choi S. Toll-like receptor modulators: a patent review (2006 - 2010). *Expert Opin Ther Pat* 2011;21:927-44.
- 150 Makkouk A, Abdelnoor AM. The potential use of Toll-like receptor (TLR) agonists and antagonists as prophylactic and/or therapeutic agents. *Immunopharmacol Immunotoxicol* 2009;31:331-8.
- 151 Clanchy FI, Sacre SM. Modulation of toll-like receptor function has therapeutic potential in autoimmune disease. *Expert Opin Biol Ther* 2010;10:1703-16.
- 152 Midwood KS, Piccinini AM, Sacre S. Targeting Toll-like receptors in autoimmunity. *Curr Drug Targets* 2009;10:1139-55.
- 153 Cbio Ltd. <http://www.cbio.com.au> (last accessed April 2011).
- 154 NovImmune. <http://www.novimmune.com> (last accessed April 2011).
- 155 Opsona Therapeutics. <http://www.opsona.com> (last accessed April 2011).
- 156 Idera Pharmaceutical. <http://www.iderapharma.com> (last accessed April 2011).
- 157 Dynavax. <http://www.dynavax.com> (last accessed April 2011).
- 158 VentiRx Pharmaceuticals. <http://www.ventirx.com> (last accessed April 2011).
- 159 GlaxoSmithKline. <http://www.gsk.com> (last accessed April 2011).
- 160 Abdollahi-Roodsaz S, Joosten LA, Roelofs MF *et al.* Inhibition of Toll-like receptor 4 breaks the inflammatory loop in autoimmune destructive arthritis. *Arthritis Rheum* 2007;56:2957-67.
- 161 Leung BP, Xu D, Culshaw S, McInnes IB, Liew FY. A novel therapy of murine collagen-induced arthritis with soluble T1/ST2. *J Immunol* 2004;173:145-50.
- 162 Drexler SK, Kong P, Inglis J *et al.* SIGIRR/TIR-8 is an inhibitor of Toll-like receptor signaling in primary human cells and regulates inflammation in models of rheumatoid arthritis. *Arthritis Rheum* 2010;62:2249-61.
- 163 Iwami KI, Matsuguchi T, Masuda A, Kikuchi T, Musikacharoen T, Yoshikai Y. Cutting edge: naturally occurring soluble form of mouse Toll-like receptor 4 inhibits lipopolysaccharide signaling. *J Immunol* 2000;165:6682-6.
- 164 Schnabl B, Brandl K, Fink M *et al.* A TLR4/MD2 fusion protein inhibits LPS-induced pro-inflammatory signaling in hepatic stellate cells. *Biochem Biophys Res Commun* 2008;375:210-4.
- 165 Zunt SL, Burton LV, Goldblatt LI, Dobbins EE, Srinivasan M. Soluble forms of Toll-like receptor 4 are present in human saliva and modulate tumour necrosis factor- $\alpha$  secretion by macrophage-like cells. *Clin Exp Immunol* 2009;156:285-93.
- 166 Kopp A, Bala M, Buechler C *et al.* C1q/TNF-related protein-3 represents a novel and endogenous lipopolysaccharide antagonist of the adipose tissue. *Endocrinology* 2010;151:5267-78.
- 167 Johnson BJ, Le TT, Dobbin CA *et al.* Heat shock protein 10 inhibits lipopolysaccharide-induced inflammatory mediator production. *J Biol Chem* 2005;280:4037-47.
- 168 Datla P, Kalluri MD, Basha K *et al.* 9,10-dihydro-2,5-dimethoxyphenanthrene-1,7-diol, from *Eulophia ochreatea*, inhibits inflammatory signalling mediated by Toll-like receptors. *Br J Pharmacol* 2010;160:1158-70.
- 169 Kalluri MD, Datla P, Bellary A *et al.* Novel synthetic gluco-disaccharide RSCL-0409—a lipopolysaccharide-induced Toll-like receptor-mediated signalling antagonist. *FEBS J* 2010;277:1639-52.
- 170 Duan GJ, Zhu J, Wan JY *et al.* A synthetic MD-2 mimetic peptide attenuates lipopolysaccharide-induced inflammatory responses in vivo and in vitro. *Int Immunopharmacol* 2010;10:1091-100.
- 171 Piazza M, Calabrese V, Baruffa C, Gioannini T, Weiss J, Peri F. The cationic amphiphile 3,4-bis(tetradecyloxy) benzylamine inhibits LPS signaling by competing with endotoxin for CD14 binding. *Biochem Pharmacol* 2010;80:2050-6.
- 172 Park SJ, Kang SH, Kang YK *et al.* Inhibition of homodimerization of Toll-like receptor 4 by 4-oxo-4-(2-oxo-oxazolidin-3-yl)-but-2-enoic acid ethyl ester. *Int Immunopharmacol* 2011;11:19-22.
- 173 Youn HS, Kim YS, Park ZY *et al.* Sulforaphane suppresses oligomerization of TLR4 in a thiol-dependent manner. *J Immunol* 2010;184:411-9.
- 174 LeBouder E, Rey-Nores JE, Rushmere NK *et al.* Soluble forms of Toll-like receptor (TLR)2 capable of modulating TLR2 signaling are present in human plasma and breast milk. *J Immunol* 2003;171:6680-9.
- 175 Dulay AT, Buhimschi CS, Zhao G *et al.* Soluble TLR2 is present in human amniotic fluid and modulates the intraamniotic inflammatory response to infection. *J Immunol* 2009;182:7244-53.
- 176 Raby AC, Le Bouder E, Colmont C *et al.* Soluble TLR2 reduces inflammation without compromising bacterial clearance by disrupting TLR2 triggering. *J Immunol* 2009;183:506-17.
- 177 Nic An Ultaigh S, Saber TP, McCormick J *et al.* Blockade of Toll-like receptor 2 prevents spontaneous cytokine release from rheumatoid arthritis ex vivo synovial explant cultures. *Arthritis Res Ther* 2011;13:R33.
- 178 Ben-Zvi I, Kivity S, Langevitz P, Shoenfeld Y. Hydroxychloroquine: From Malaria to Autoimmunity. *Clin Rev Allergy Immunol* 2011; doi:10.1007/s12016-010-8243-x.
- 179 Kuznik A, Bencina M, Svaiger U, Jeras M, Rozman B, Jerala R. Mechanism of Endosomal TLR Inhibition by Antimalarial Drugs and Imidazoquinolines. *J Immunol* 2011;186:4794-804.
- 180 Sacre S, Medghalchi M, Gregory B, Brennan F, Williams R. Fluoxetine and citalopram exhibit potent antiinflammatory activity in human and murine models of rheumatoid arthritis and inhibit Toll-like receptors. *Arthritis Rheum* 2010;62:683-93.
- 181 Ranjith-Kumar CT, Duffy KE, Jordan JL *et al.* Single-stranded oligonucleotides can inhibit cytokine production induced by human Toll-like receptor 3. *Mol Cell Biol* 2008;28:4507-19.
- 182 Barrat FJ, Meeker T, Gregorio J *et al.* Nucleic acids of mammalian origin can act as endogenous ligands for Toll-like receptors and may promote systemic lupus erythematosus. *J Exp Med* 2005;202:1131-9.
- 183 Lenert PS. Classification, mechanisms of action, and therapeutic applications of inhibitory oligonucleotides for Toll-like receptors (TLR) 7 and 9. *Mediators Inflamm* 2010;2010: 986596.

- 184 Dong L, Ito S, Ishii KJ, Klinman DM. Suppressive oligonucleotides protect against collagen-induced arthritis in mice. *Arthritis Rheum* 2004;50:1686–9.
- 185 Zeuner RA, Ishii KJ, Lizak MJ *et al.* Reduction of CpG-induced arthritis by suppressive oligodeoxynucleotides. *Arthritis Rheum* 2002;46:2219–24.
- 186 Hammaker D, Firestein GS. "Go upstream, young man": lessons learned from the p38 saga. *Ann Rheum Dis* 2010;69(Suppl. 1):i77–82.
- 187 Alten RE, Zerbini C, Jeka S *et al.* Efficacy and safety of pamapimod in patients with active rheumatoid arthritis receiving stable methotrexate therapy. *Ann Rheum Dis* 2010;69:364–7.
- 188 Cohen SB, Cheng TT, Chindalore V *et al.* Evaluation of the efficacy and safety of pamapimod, a p38 MAP kinase inhibitor, in a double-blind, methotrexate-controlled study of patients with active rheumatoid arthritis. *Arthritis Rheum* 2009;60:335–44.
- 189 Mourey RJ, Burnette BL, Brustkern SJ *et al.* A benzothiofene inhibitor of mitogen-activated protein kinase-activated protein kinase 2 inhibits tumor necrosis factor alpha production and has oral anti-inflammatory efficacy in acute and chronic models of inflammation. *J Pharmacol Exp Ther* 2010;333:797–807.
- 190 Kang JS, Kim HM, Choi IY *et al.* DBM1285 suppresses tumor necrosis factor alpha production by blocking p38 mitogen-activated protein kinase/mitogen-activated protein kinase-activated protein kinase 2 signaling pathway. *J Pharmacol Exp Ther* 2010;334:657–64.
- 191 Hammaker D, Sweeney S, Firestein GS. Signal transduction networks in rheumatoid arthritis. *Ann Rheum Dis* 2003;62(Suppl. 2):ii86–9.
- 192 Schopf L, Savinainen A, Anderson K *et al.* IKKbeta inhibition protects against bone and cartilage destruction in a rat model of rheumatoid arthritis. *Arthritis Rheum* 2006;54:3163–73.
- 193 Wakamatsu K, Nanki T, Miyasaka N, Umezawa K, Kubota T. Effect of a small molecule inhibitor of nuclear factor-kappaB nuclear translocation in a murine model of arthritis and cultured human synovial cells. *Arthritis Res Ther* 2005;7:R1348–59.
- 194 Okamoto H, Yoshio T, Kaneko H, Yamanaka H. Inhibition of NF-kappaB signaling by fasudil as a potential therapeutic strategy for rheumatoid arthritis. *Arthritis Rheum* 2010;62:82–92.
- 195 Iyer S, Kontoyiannis D, Chevrier D *et al.* Inhibition of tumor necrosis factor mRNA translation by a rationally designed immunomodulatory peptide. *J Biol Chem* 2000;275:17051–7.
- 196 DeVry CG, Valdez M, Gao L *et al.* RDP58, a novel immunomodulatory peptide, ameliorates clinical signs of disease in the Lewis rat model of acute experimental autoimmune encephalomyelitis. *J Neuroimmunol* 2004; 152:33–43.
- 197 Liu W, Deyoung BR, Chen X, Evanoff DP, Luo Y. RDP58 inhibits T cell-mediated bladder inflammation in an autoimmune cystitis model. *J Autoimmun* 2008;30: 257–65.
- 198 genzyme. <http://www.genzyme.com> (last accessed April 2011).
- 199 Loiarro M, Capolunghi F, Fanto N *et al.* Pivotal advance: inhibition of MyD88 dimerization and recruitment of IRAK1 and IRAK4 by a novel peptidomimetic compound. *J Leukoc Biol* 2007;82:801–10.
- 200 Capolunghi F, Rosado MM, Cascioli S *et al.* Pharmacological inhibition of TLR9 activation blocks autoantibody production in human B cells from SLE patients. *Rheumatology* 2010;49:2281–9.
- 201 Kokkola R, Li J, Sundberg E *et al.* Successful treatment of collagen-induced arthritis in mice and rats by targeting extracellular high mobility group box chromosomal protein 1 activity. *Arthritis Rheum* 2003;48: 2052–8.
- 202 Rice JW, Veal JM, Fadden RP *et al.* Small molecule inhibitors of Hsp90 potentially affect inflammatory disease pathways and exhibit activity in models of rheumatoid arthritis. *Arthritis Rheum* 2008;58: 3765–75.
- 203 Pisetsky DS, Erlandsson-Harris H, Andersson U. High-mobility group box protein 1 (HMGB1): an alarmin mediating the pathogenesis of rheumatic disease. *Arthritis Res Ther* 2008;10:209.
- 204 Andersson U, Harris HE. The role of HMGB1 in the pathogenesis of rheumatic disease. *Biochim Biophys Acta* 2010;1799:141–8.
- 205 Wang H, Liao H, Ochani M *et al.* Cholinergic agonists inhibit HMGB1 release and improve survival in experimental sepsis. *Nat Med* 2004;10:1216–21.
- 206 Tang D, Kang R, Xiao W *et al.* Quercetin prevents LPS-induced high-mobility group box 1 release and proinflammatory function. *Am J Respir Cell Mol Biol* 2009;41:651–60.
- 207 Chen G, Li J, Qiang X *et al.* Suppression of HMGB1 release by stearyl lysophosphatidylcholine: an additional mechanism for its therapeutic effects in experimental sepsis. *J Lipid Res* 2005;46:623–7.
- 208 Johnson GB, Brunn GJ, Platt JL. Cutting edge: an endogenous pathway to systemic inflammatory response syndrome (SIRS)-like reactions through Toll-like receptor 4. *J Immunol* 2004;172:20–4.
- 209 Kakimoto K, Matsukawa A, Yoshinaga M, Nakamura H. Suppressive effect of a neutrophil elastase inhibitor on the development of collagen-induced arthritis. *Cell Immunol* 1995;165:26–32.
- 210 Grimstein C, Choi YK, Wasserfall CH *et al.* Alpha-1 antitrypsin protein and gene therapies decrease autoimmunity and delay arthritis development in mouse model. *J Transl Med* 2011;9:21.
- 211 Guo H, Ingolia NT, Weissman JS, Bartel DP. Mammalian microRNAs predominantly act to decrease target mRNA levels. *Nature* 2010;466:835–40.
- 212 Baek D, Villen J, Shin C, Camargo FD, Gygi SP, Bartel DP. The impact of microRNAs on protein output. *Nature* 2008;455:64–71.
- 213 Pauley KM, Cha S, Chan EK. MicroRNA in autoimmunity and autoimmune diseases. *J Autoimmun* 2009;32: 189–94.
- 214 O'Neill LA, Sheedy FJ, McCoy CE. MicroRNAs: the fine-tuners of Toll-like receptor signalling. *Nat Rev Immunol* 2011;11:163–75.
- 215 Sheedy FJ, Palsson-McDermott E, Hennessy EJ *et al.* Negative regulation of TLR4 via targeting of the proinflammatory tumor suppressor PDCD4 by the microRNA miR-21. *Nat Immunol* 2010;11:141–7.



- 216 Stanczyk J, Pedrioli DM, Brentano F *et al*. Altered expression of microRNA in synovial fibroblasts and synovial tissue in rheumatoid arthritis. *Arthritis Rheum* 2008; 58:1001–9.
- 217 Li J, Wan Y, Guo Q *et al*. Altered microRNA expression profile with miR-146a upregulation in CD4+ T cells from patients with rheumatoid arthritis. *Arthritis Res Ther* 2010;12:R81.
- 218 Stanczyk J, Ospelt C, Karouzakis E *et al*. Altered expression of microRNA-203 in rheumatoid arthritis synovial fibroblasts and its role in fibroblast activation. *Arthritis Rheum* 2011;63:373–81.
- 219 Govindaraj RG, Manavalan B, Lee G, Choi S. Molecular modeling-based evaluation of hTLR10 and identification of potential ligands in Toll-like receptor signaling. *PLoS One* 2010;5:e12713.
- 220 Hirata N, Yanagawa Y, Ebihara T *et al*. Selective synergy in anti-inflammatory cytokine production upon cooperated signaling via TLR4 and TLR2 in murine conventional dendritic cells. *Mol Immunol* 2008;45: 2734–42.
- 221 Vanhoutte F, Paget C, Breuilh L *et al*. Toll-like receptor (TLR)2 and TLR3 synergy and cross-inhibition in murine myeloid dendritic cells. *Immunol Lett* 2008;116:86–94.
- 222 Rallabhandi P, Nhu QM, Toshchakov VY *et al*. Analysis of proteinase-activated receptor 2 and TLR4 signal transduction: a novel paradigm for receptor cooperativity. *J Biol Chem* 2008;283:24314–25.
- 223 Kanke T, Takizawa T, Kabeya M, Kawabata A. Physiology and pathophysiology of proteinase-activated receptors (PARs): PAR-2 as a potential therapeutic target. *J Pharmacol Sci* 2005;97:38–42.
- 224 Goon Goh F, Sloss CM, Cunningham MR, Nilsson M, Cadalbert L, Plevin R. G-protein-dependent and-independent pathways regulate proteinase-activated receptor-2 mediated p65 NFkappaB serine 536 phosphorylation in human keratinocytes. *Cell Signal* 2008;20:1267–74.
- 225 Nhu QM, Shirey K, Teijaro JR *et al*. Novel signaling interactions between proteinase-activated receptor 2 and Toll-like receptors in vitro and in vivo. *Mucosal Immunol* 2010;3:29–39.
